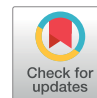

# Erratum

**Erratum. Combination Therapy With Exenatide Plus Pioglitazone Versus Basal/Bolus Insulin in Patients With Poorly Controlled Type 2 Diabetes on Sulfonylurea Plus Metformin: The Qatar Study. Diabetes Care 2017;40:325–331**

<https://doi.org/10.2337/dc17-er08d>

*Muhammad Abdul-Ghani,  
Osama Migahid, Ayman Megahed,  
John Adams, Curtis Triplitt,  
Ralph A. DeFronzo, Mahmoud Zirie, and  
Amin Jayyousi*

In the above-mentioned article, Fig. 1A was corrected (the colors in the panel were switched) to be consistent with panel 1B and with the text, and panel 1C had a missing double asterisk added.

The online version of the figure has been corrected to reflect these changes.

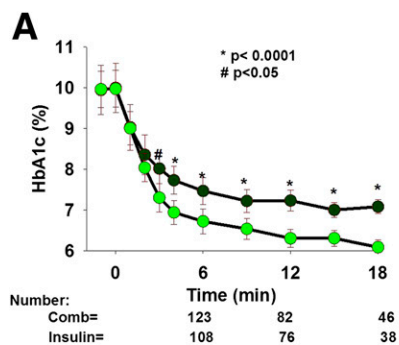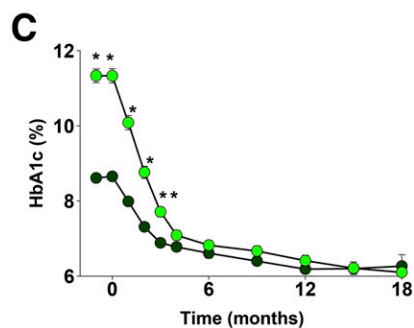

Source: https://ada.silverchair.com/care/article-pdf/40/8/1134/553316/dc17er08d.pdf
